# Supplementary material for: Chemical differentiation of Da-Cheng-Qi decoction and its three analogous decoctions using UFLC-IT-TOF/MS-based chemomic and chemometric approach
Source: Royal Society of Chemistry journal article supplement (doi:10.1039/c3ay41986j), 2013-12-20
Supplement: c3ay41986j.pdf [file c3ay41986j.pdf]

## 1 **Supplementary Material**

2 Preparation of DCQD, XCQD, HPDHD, HPSWD and three single-herb decoctions

3 The DCQD was prepared according to the method and procedure described in Shang-Han-Lun and was  
4 optimized [11]: the bark of *Magnolia officinalis Rehd* (Magnoliaceae, 24 g) and *Fructus Aurantii Immaturus*  
5 (Rutaceae, 15 g) were immersed in 200 mL distilled water for 30 min and boiled until half of the original amount  
6 was left. This procedure was repeated. The two water extracts were combined. the root and bark of *Radix et*  
7 *Rhizoma Rhei* (Polygonaceae, 12 g) were then immersed in the above mentioned combined water extracts for  
8 20min and boiled until half of the original amount was left and this procedure was repeated in 200 mL distilled  
9 water. The two water extracts were combined and then *Mirabilitum* (mirabilite, crystals of sodium sulfate, Na<sub>2</sub>SO<sub>4</sub>,  
10 6 g) was dissolved in the water extract. The extract was then filtered and diluted to 250mL with distilled water and  
11 stored at -80 °C until use.

12 The XCQD was prepared as follows: the root and bark of *Radix et Rhizoma Rhei* (12 g), the bark of *Magnolia*  
13 *officinalis Rehd* (6 g) and *Fructus Aurantii Immaturus* (9 g) were immersed in 300mL distilled water for 30min  
14 and boiled until half of the original amount was left. This procedure was repeated in 200 mL distilled water. The  
15 two water extracts were combined and diluted to 250 mL with distilled water and stored at -80 °C until use.

16 The HPDHD was prepared just as XCQD: the root and bark of *Radix et Rhizoma Rhei* (18 g), the bark of  
17 *Magnolia officinalis Rehd* (24 g) and *Fructus Aurantii Immaturus* (12 g) were immersed in 300mL distilled water  
18 for 30 min and boiled until half of the original amount was left. This procedure was repeated in 200 mL distilled  
19 water. The two water extracts were combined and diluted to 250mL with distilled water and stored at -80 °C until  
20 use.

21 The HPSWD was prepared just as DCQD without adding *Mirabilitum*.

22 Single-herb decoctions of the root and bark of *Radix et Rhizoma Rhei* (12g), the bark of *Magnolia officinalis*  
23 *Rehd* (24g), *Fructus Aurantii Immaturus* (15g) were immersed in 200mL distilled water for 30min respectively and  
24 boiled until half of the original amount was left. This procedure was repeated in 200 mL distilled water. The two  
25 water extracts were combined and diluted to 250mL with distilled water and stored at -80 °C until use.

26  
27  
28  
29  
30

31

Table 1 The features generated after each filtering step

|                                   | Total Features generated<br>using Profiling Solution | features left after 80% rule |          | features left after VIP >1 |          |
|-----------------------------------|------------------------------------------------------|------------------------------|----------|----------------------------|----------|
|                                   |                                                      | positive                     | negative | positive                   | negative |
| <i>Mangolia officinalis</i>       | 717                                                  | 65                           | 110      | 19                         | 26       |
| <i>Radix et Rhizoma Rhei</i>      | 714                                                  | 54                           | 122      | 16                         | 24       |
| <i>fructus Aurantii Immaturus</i> | 713                                                  | 138                          | 244      | 34                         | 48       |

32

33

34

Table 2 Components identified from DCQD, XCQD, HPDHD, HPSWD in detail

| Peak no. | t <sub>R</sub> (min) | Assigned identity                           | VIP     | P value | polarity | origin                  |
|----------|----------------------|---------------------------------------------|---------|---------|----------|-------------------------|
| 1        | 1.267                | citric acid                                 | 1.50922 | 0.005   | -        |                         |
| 2        | 5.582                | catechin                                    | 1.40609 | 0.044   | +        |                         |
| 3        | 10.117               | Cinnamoyl glucose1                          | 1.08846 | 0.034   | +        | <i>Radix et</i>         |
| 4        | 12.033               | Cinnamoyl glucose2                          | 1.04518 | 0.002   | +        | <i>Rhizoma Rhei</i>     |
| 5        | 23.757               | rhein                                       | 1.40394 | 0.016   | -        |                         |
| 6        | 10.535               | Magloside A                                 | 1.37919 | 0.003   | -        |                         |
| 7        | 14.348               | magnolol B                                  | 1.12307 | 0.016   | -        |                         |
| 8        | 14.592               | Acteoside                                   | 1.01294 | 0.002   | -        |                         |
| 9        | 14.906               | Magloside E                                 | 2.64475 | 0.004   | -        | <i>Mangolia</i>         |
| 10       | 18.603               | magnolignan A                               | 1.34576 | 0.02    | -        | <i>officinalis</i>      |
| 11       | 21.456               | Magnaldehyde D                              | 1.10664 | 0.005   | -        |                         |
| 12       | 22.689               | Magnaldehyde B                              | 1.33    | 0.044   | -        |                         |
| 13       | 24.633               | magnolol                                    | 2.91069 | 0.001   | -        |                         |
| 14       | 0.915                | Scopoletin                                  | 1.92575 | 0.015   | -        |                         |
| 15       | 1.018                | synephrine                                  | 1.17819 | 0.006   | +        |                         |
| 16       | 1.216                | 3,5-dihydroxy phenyl<br>1-O-β-D-glycosidase | 1.78352 | 0.01    | -        |                         |
| 17       | 1.553                | adenosine                                   | 1.12193 | 0.014   | +        |                         |
| 18       | 12.393               | Neoeriocitrin                               | 1.61417 | 0.008   | -        |                         |
| 19       | 13.964               | naringin                                    | 2.43343 | 0.042   | -        | <i>fructus Aurantii</i> |
| 20       | 14.596               | Hesperitin-glucoside                        | 1.02867 | 0.036   | -        | <i>Immaturus</i>        |
| 21       | 14.781               | hesperidin                                  | 1.20988 | 0.002   | +        |                         |
| 22       | 14.947               | neohesperidin                               | 2.23212 | 0.002   | -        |                         |
| 23       | 15.445               | Rhoifolin                                   | 1.03341 | 0.008   | -        |                         |
| 24       | 18.064               | limonin                                     | 1.15561 | 0.023   | +        |                         |
| 25       | 21.398               | Marmin                                      | 1.60869 | 0.004   | +        |                         |
| 26       | 24.063               | tangeretin                                  | 1.39182 | 0.005   | +        |                         |

35

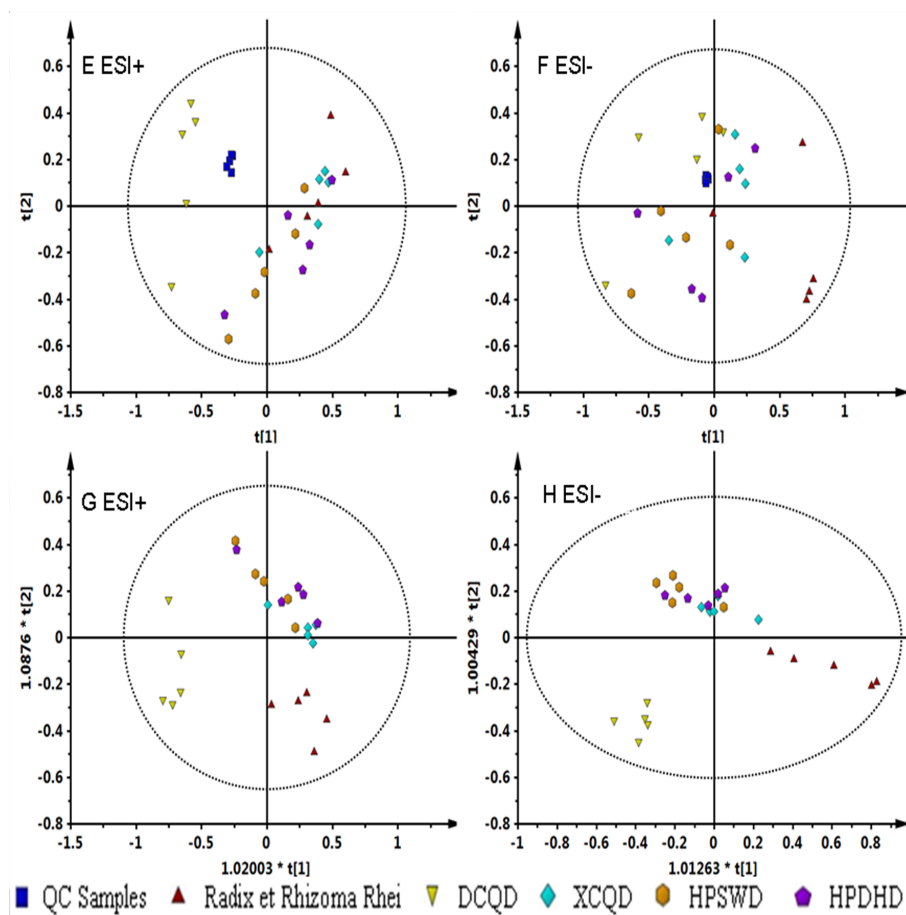

36

37 Fig.A Scores plots of principal components analysis (PCA) (E: ESI+; F: ESI-) and orthogonal partial least squares

38 discriminant analysis (OPLS-DA) (G: ESI+; H: ESI-) models of the peaks of *Radix et Rhizoma Rhei* with the

39 statistical parameters as follows: E  $R^2X=0.811$ ,  $Q^2=0.315$ ; F  $R^2X=0.648$ ,  $Q^2=0.463$ ; G  $R^2X=0.665$ ,  $R^2Y=0.688$ ,

40  $Q^2=0.323$ ; H  $R^2X=0.617$ ,  $R^2Y=0.458$ ,  $Q^2=0.327$ .

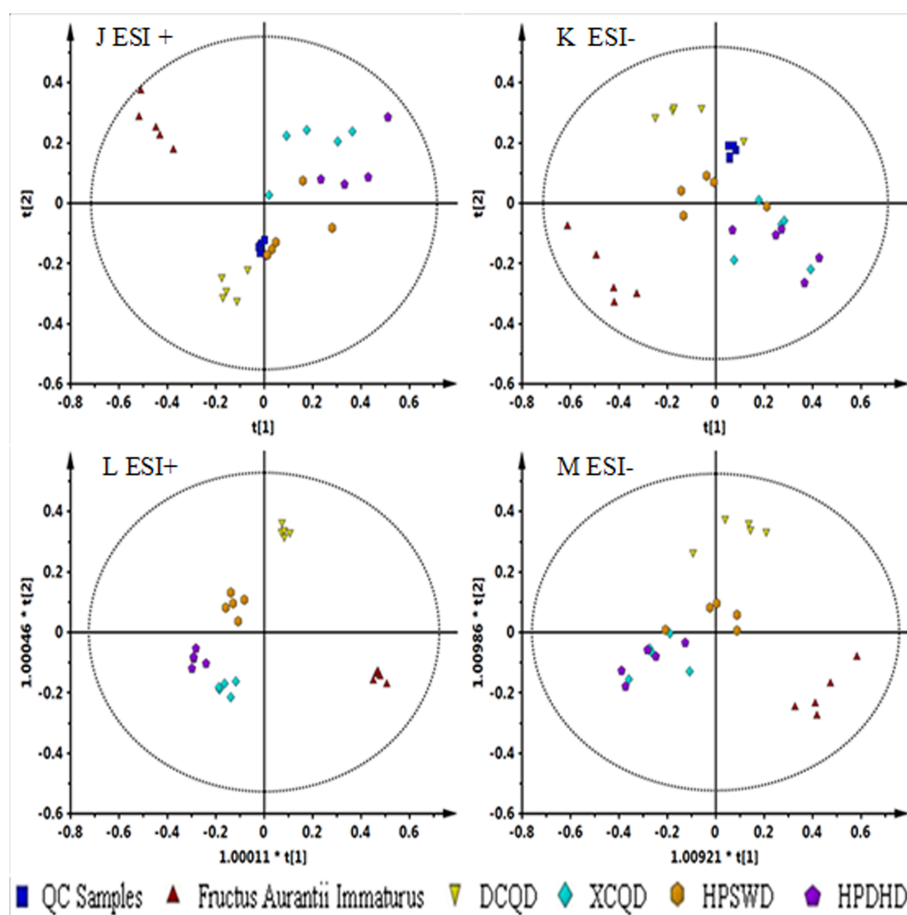

41

42 Fig.B Scores plots of principal components analysis (PCA) (J: ESI+; K: ESI-) and orthogonal partial least squares

43 discriminant analysis (OPLS-DA) (L: ESI+; M: ESI-) models of the peaks of *Fructus Aurantii Immaturus* with the

44 statistical parameters as follows: J  $R^2X=0.701$ ,  $Q^2=0.294$ ; K  $R^2X=0.648$ ,  $Q^2=0.463$ ; L  $R^2X=0.854$ ,  $R^2Y=0.981$ ,

45  $Q^2=0.709$ ; M  $R^2X=0.586$ ,  $R^2Y=0.845$ ,  $Q^2=0.342$ .
